# Supplementary material for: Enhanced lysis by bispecific oncolytic measles viruses simultaneously using HER2/neu or EpCAM as target receptors
Source: PubMed Central journal article supplement — Mol Ther Oncolytics. 2016 Feb 24;3:16003–. doi: 10.1038/mto.2016.3 (PMC4824561; doi:10.1038/mto.2016.3), 2016-02-24
Supplement: mto20163-s1.pdf [file mto20163-s1.pdf]

## Supplementary Material

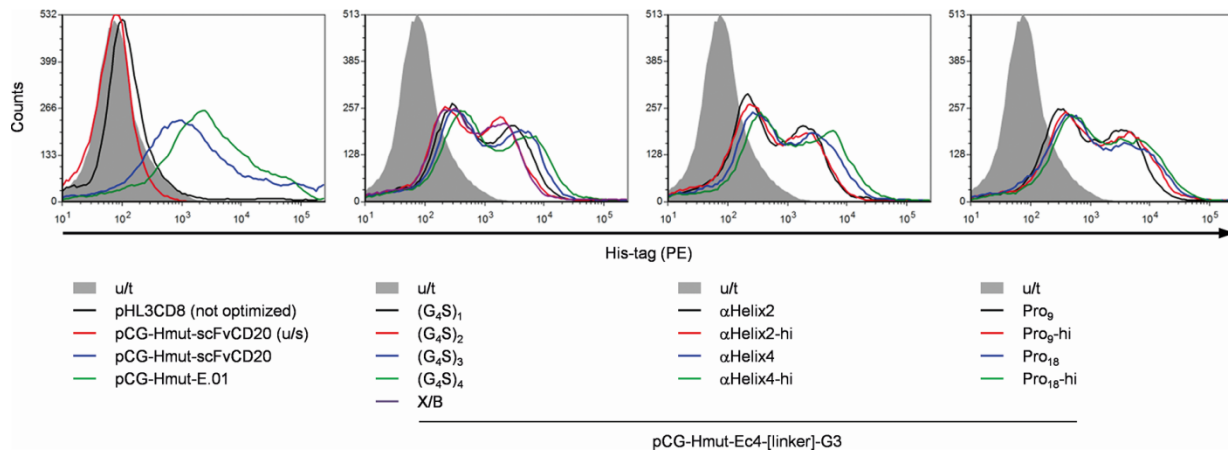

**Figure S1** Expression of different bispecific H constructs at the cell surface

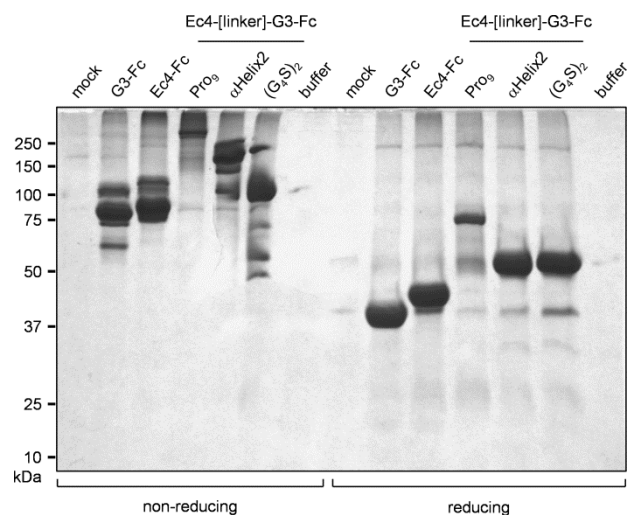

**Figure S2** Expression of recombinant DARPin-based targeting cassettes as Fc fusion proteins.

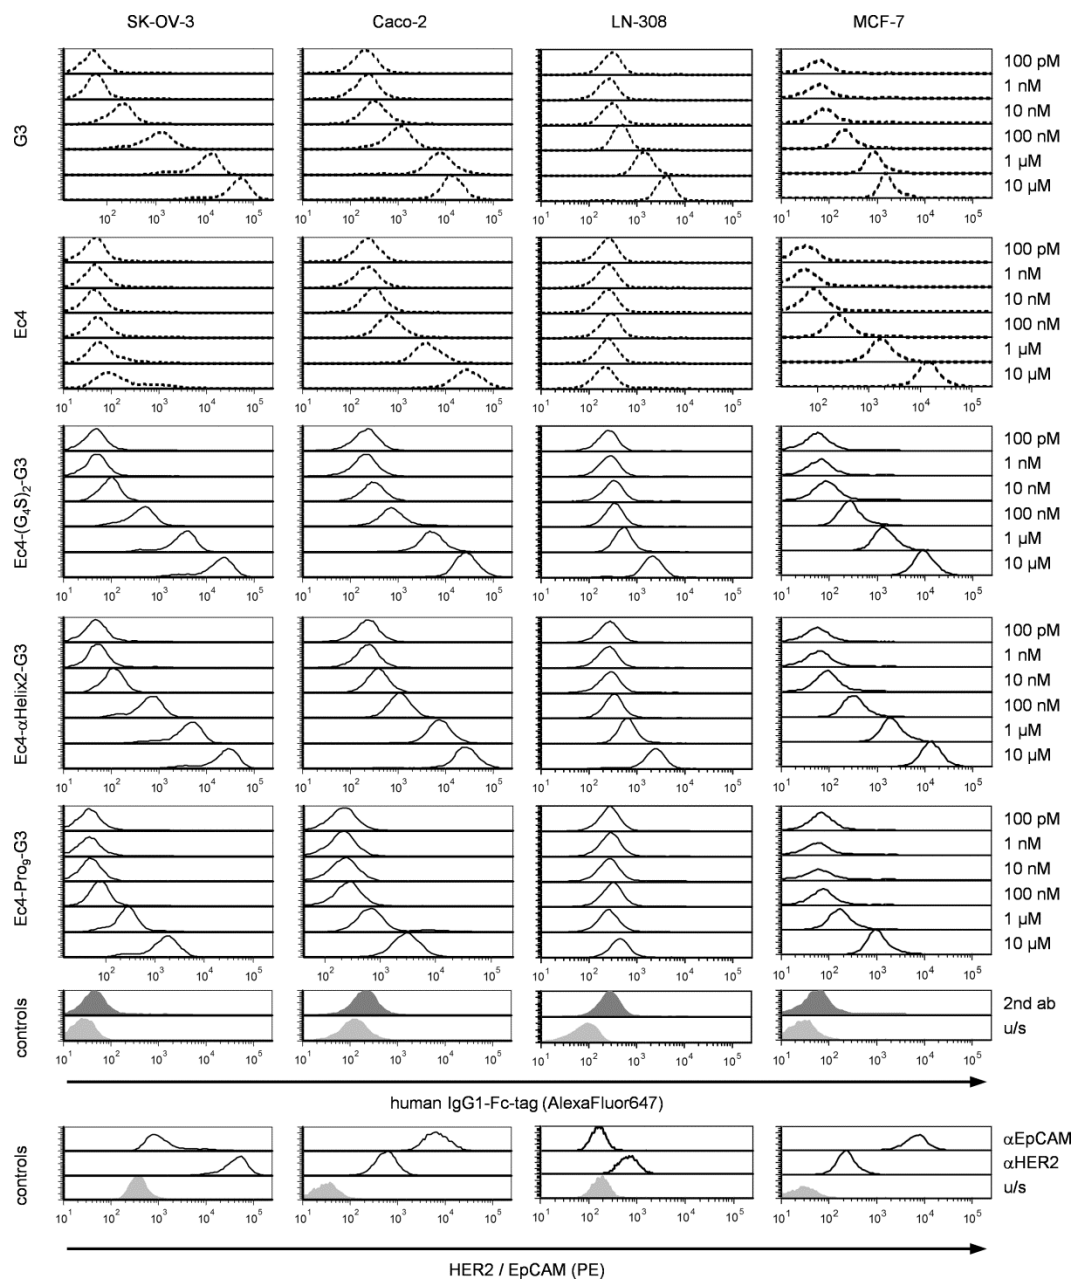

**Figure S3** DARPin-Fc proteins bind to tumor cell lines in a concentration-dependent manner

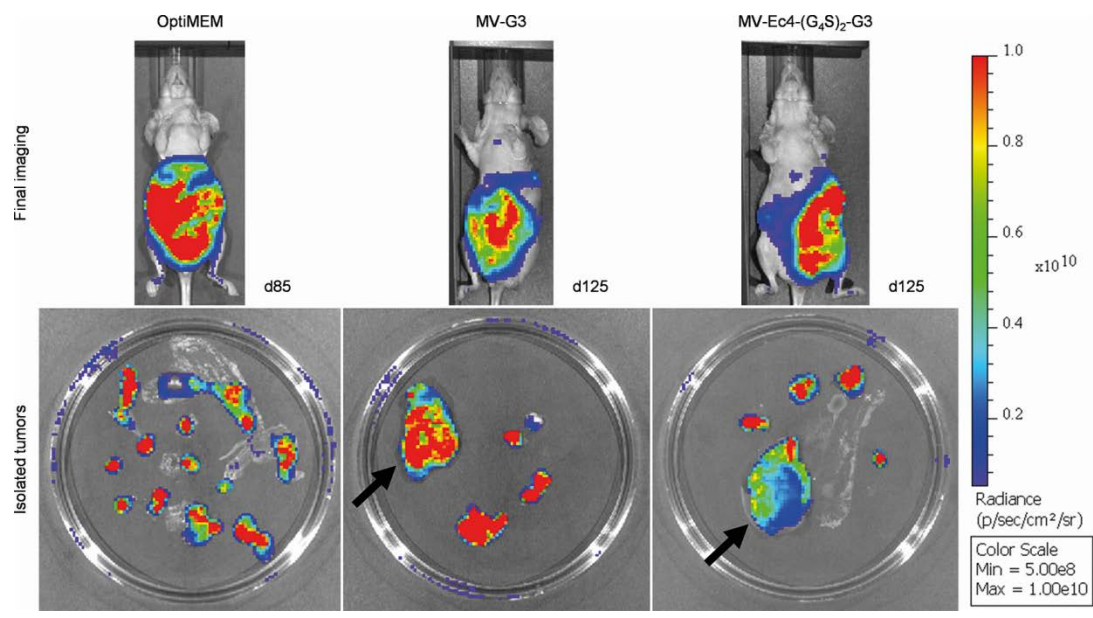

**Figure S4** Pattern of tumor growth changes after MV treatment.

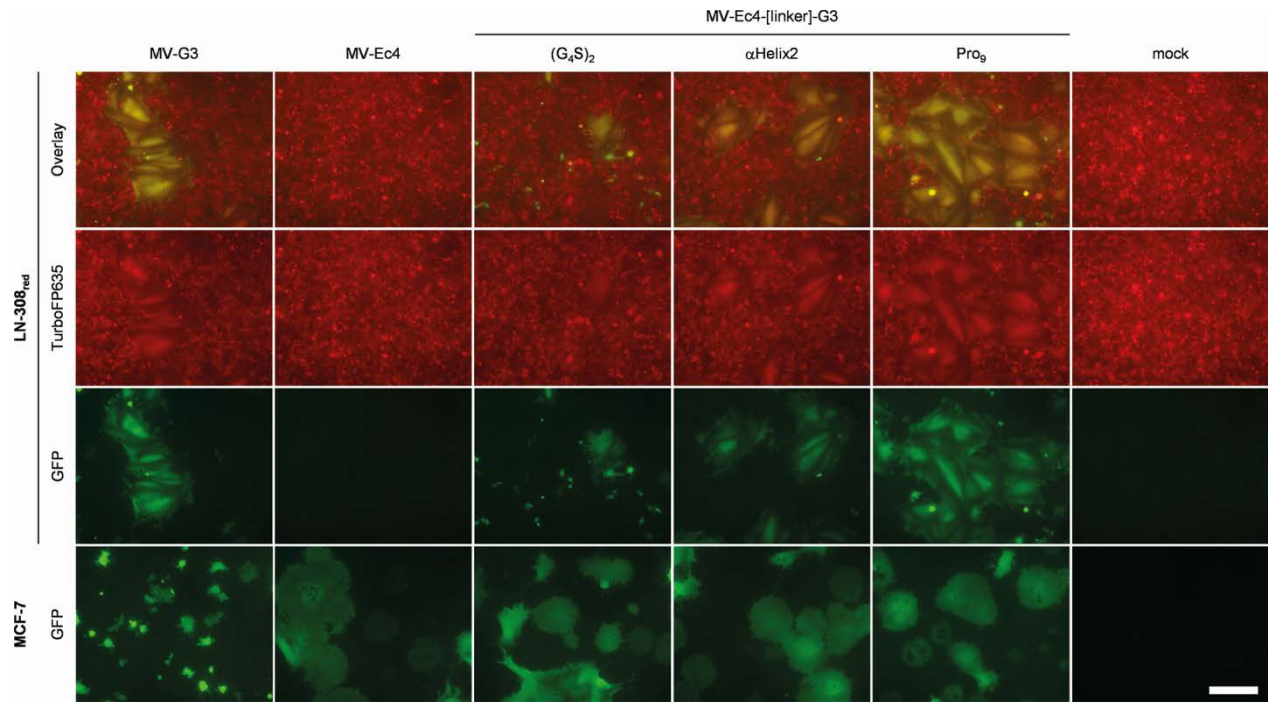

**Figure S5** Infection of tumor cell lines highly different in target antigen expression.
